# Supplementary material for: Electronically tuned 1,3,5-triarylpyrazolines as Cu(i)-selectivefluorescent probes
Source: Royal Society of Chemistry journal article supplement (doi:10.1039/b918311f), 2009-12-02

# Electronically Tuned 1,3,5-Triarylpyrazolines as Cu(I)-Selective Fluorescent Probes

Manjusha Verma, Aneese F. Chaudhry, M. Thomas Morgan, and Christoph J. Fahrni

## Supporting Information

### Table of Contents

|                                                                                  |    |
|----------------------------------------------------------------------------------|----|
| 1. <sup>1</sup> H-NMR spectra of compounds <b>4</b> and <b>5</b>                 | S2 |
| 2. <sup>1</sup> H-NMR and <sup>19</sup> F-NMR spectra of compound <b>6</b>       | S3 |
| 3. <sup>1</sup> H-NMR and <sup>19</sup> F-NMR spectra of compound (±)- <b>1a</b> | S4 |
| 4. <sup>1</sup> H-NMR and <sup>19</sup> F-NMR spectra of compound (±)- <b>1b</b> | S5 |
| 5. <sup>1</sup> H-NMR and <sup>19</sup> F-NMR spectra of compound (±)- <b>1c</b> | S6 |
| 6. <sup>1</sup> H-NMR and <sup>19</sup> F-NMR spectra of compound (±)- <b>1d</b> | S7 |
| 7. <sup>1</sup> H-NMR and <sup>19</sup> F-NMR spectra of compound (±)- <b>1e</b> | S8 |
| 8. <sup>1</sup> H-NMR and <sup>19</sup> F-NMR spectra of compound (±)- <b>1f</b> | S9 |

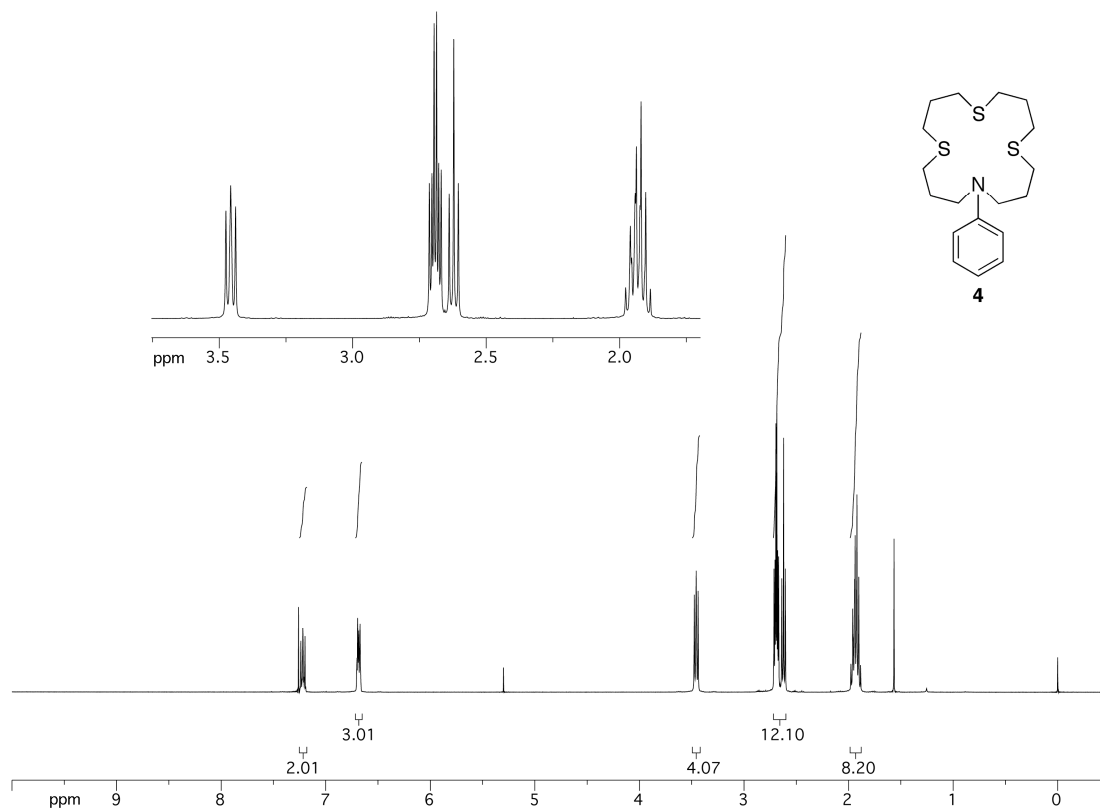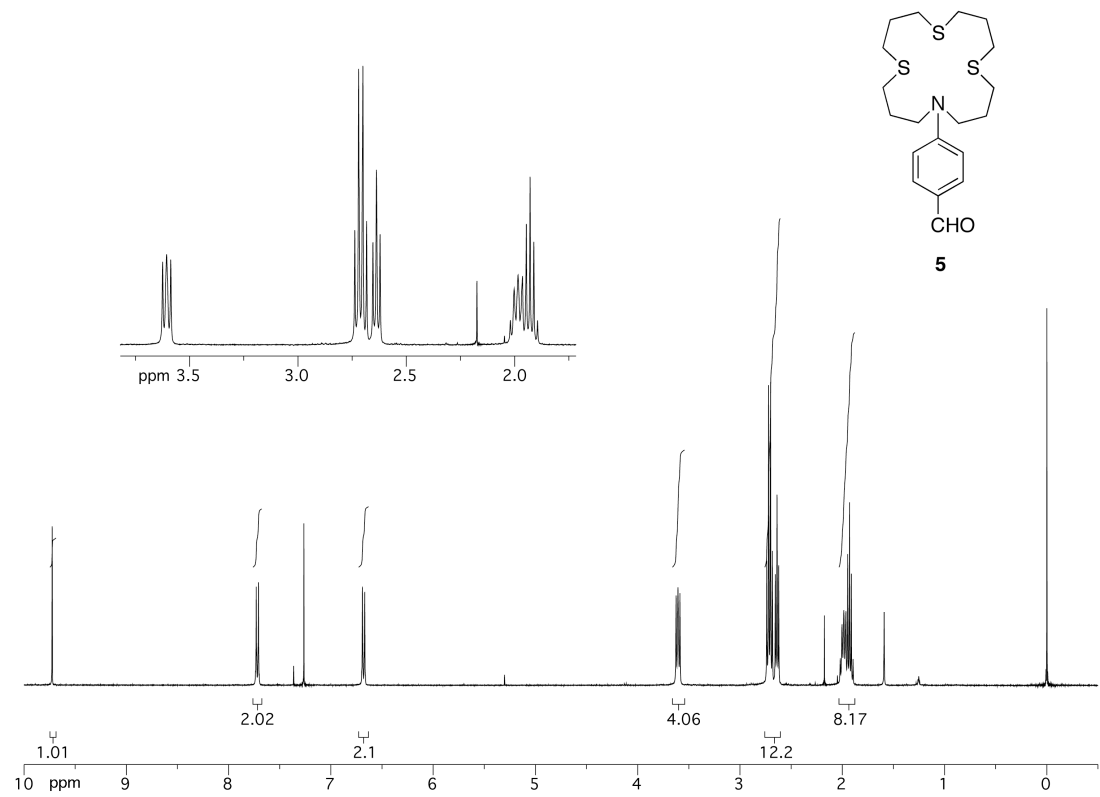

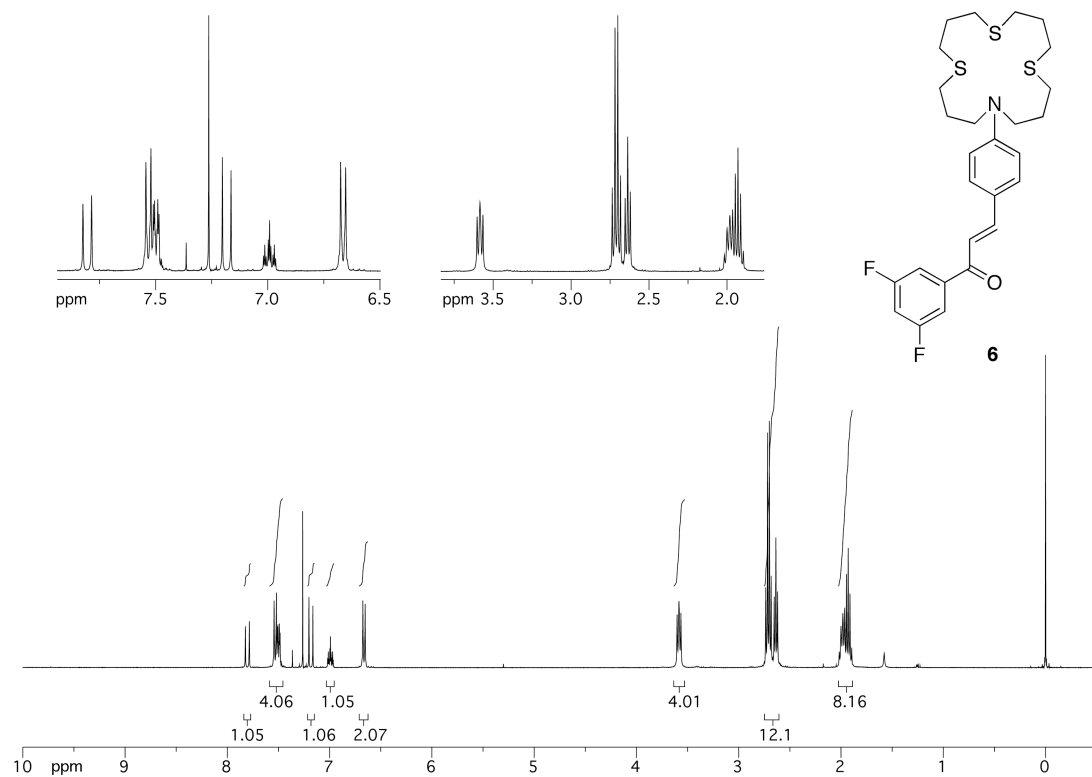

**<sup>19</sup>F-NMR (CDCl<sub>3</sub>, 376 MHz)**

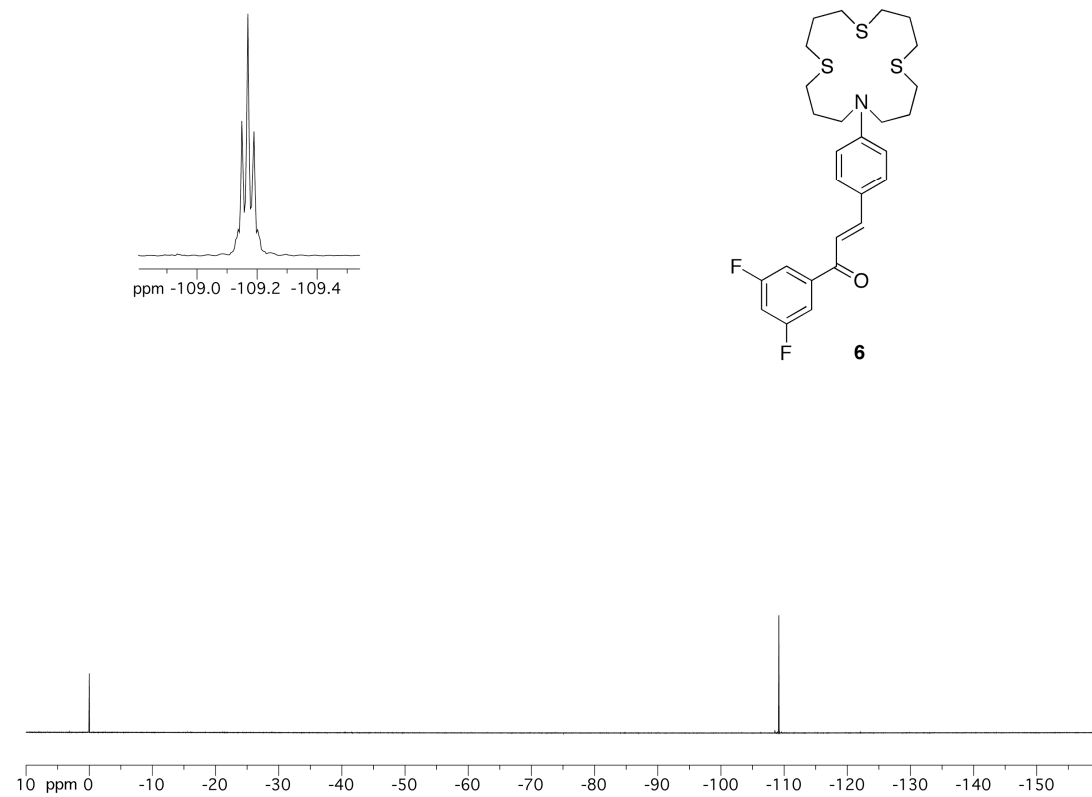

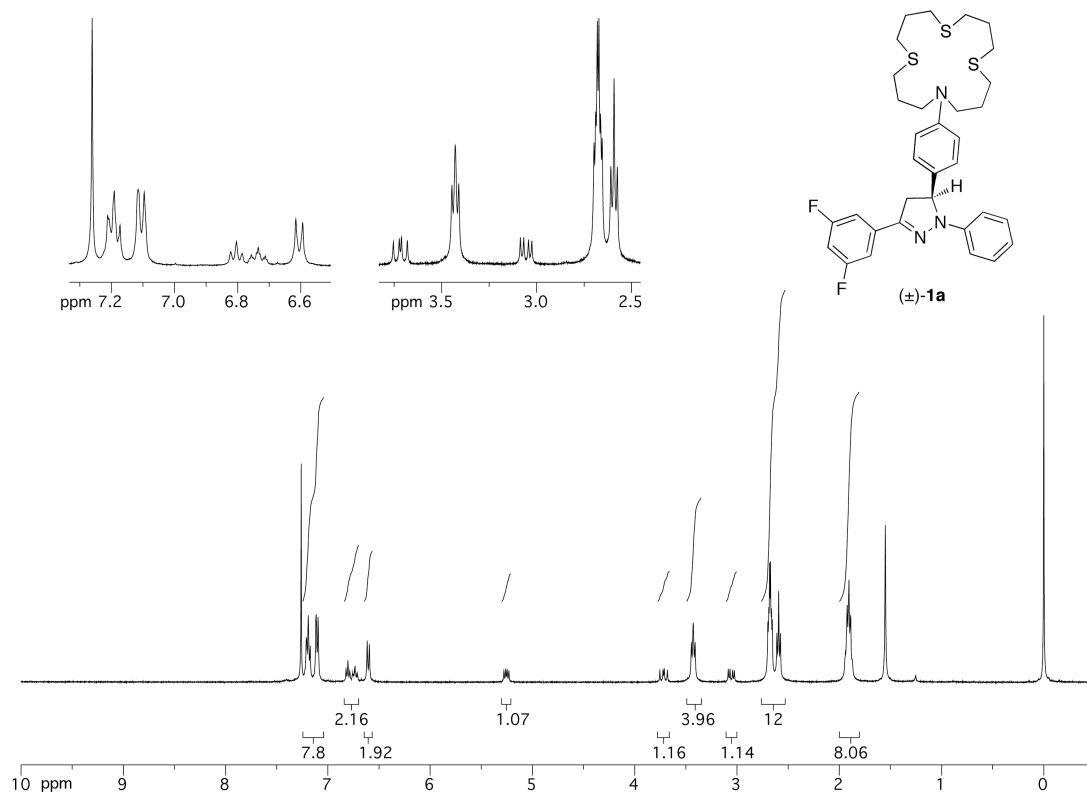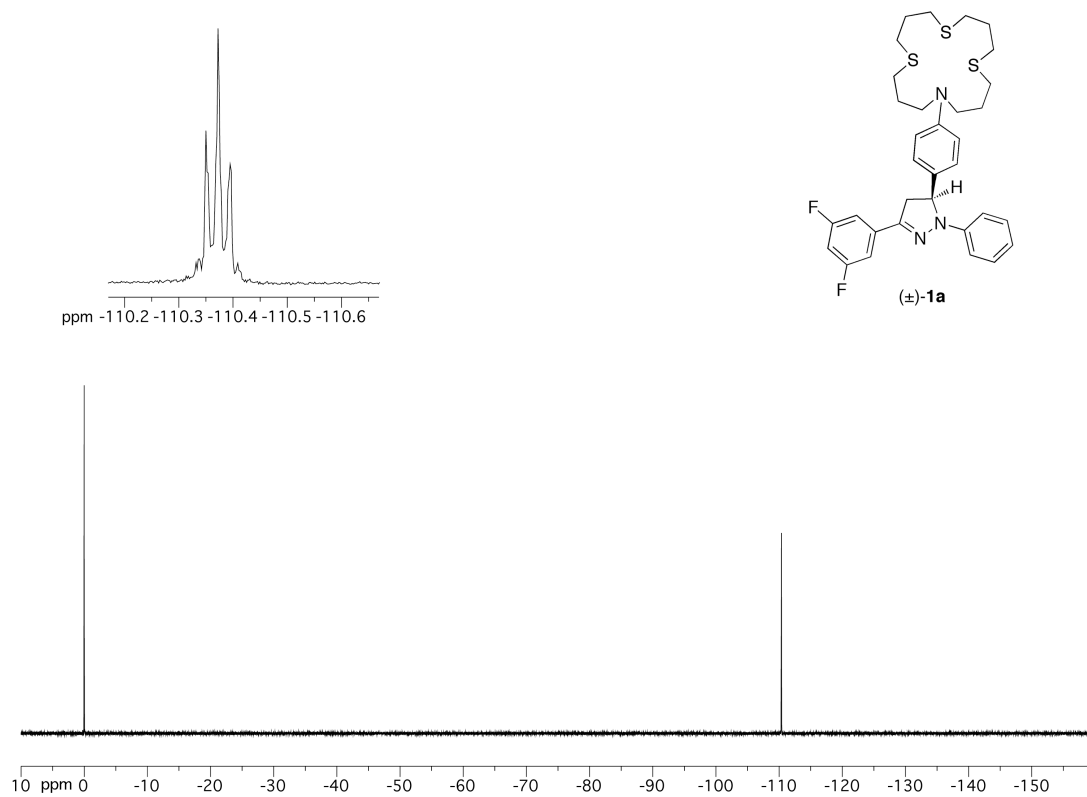

**<sup>1</sup>H-NMR (CDCl<sub>3</sub>, 400 MHz)**

Supplementary Material (ESI) for Organic & Biomolecular Chemistry  
This journal is (c) The Royal Society of Chemistry 2010

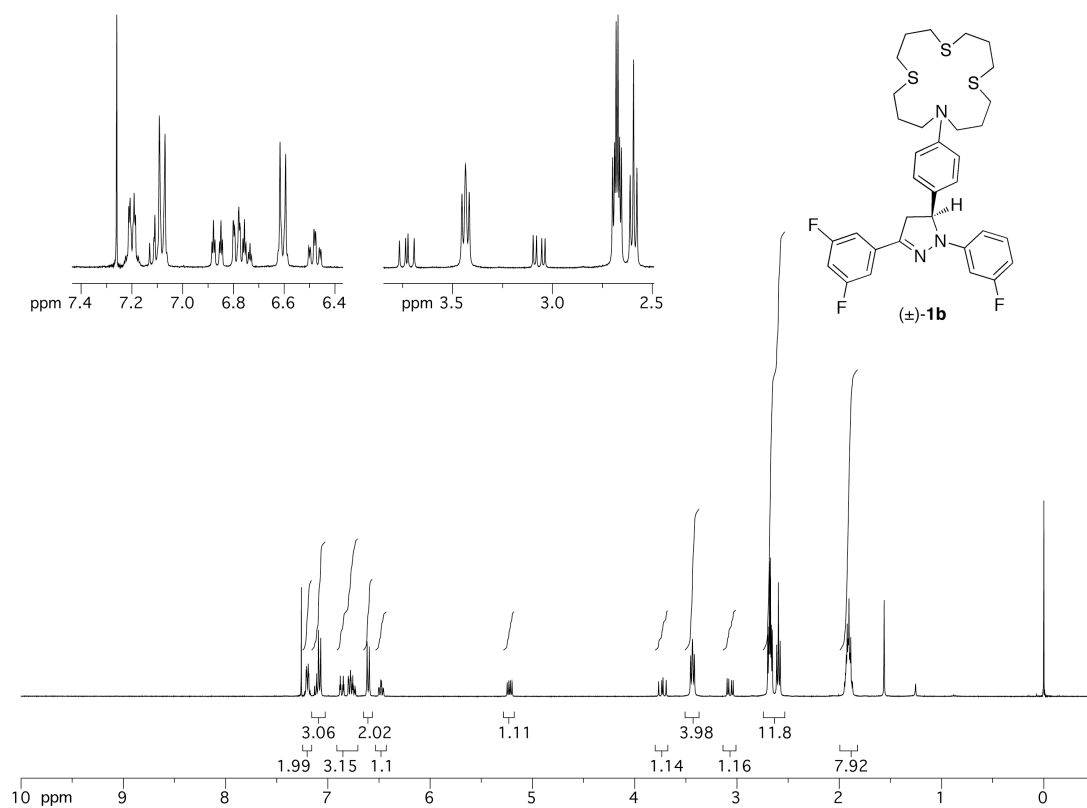

**<sup>19</sup>F-NMR (CDCl<sub>3</sub>, 376 MHz)**

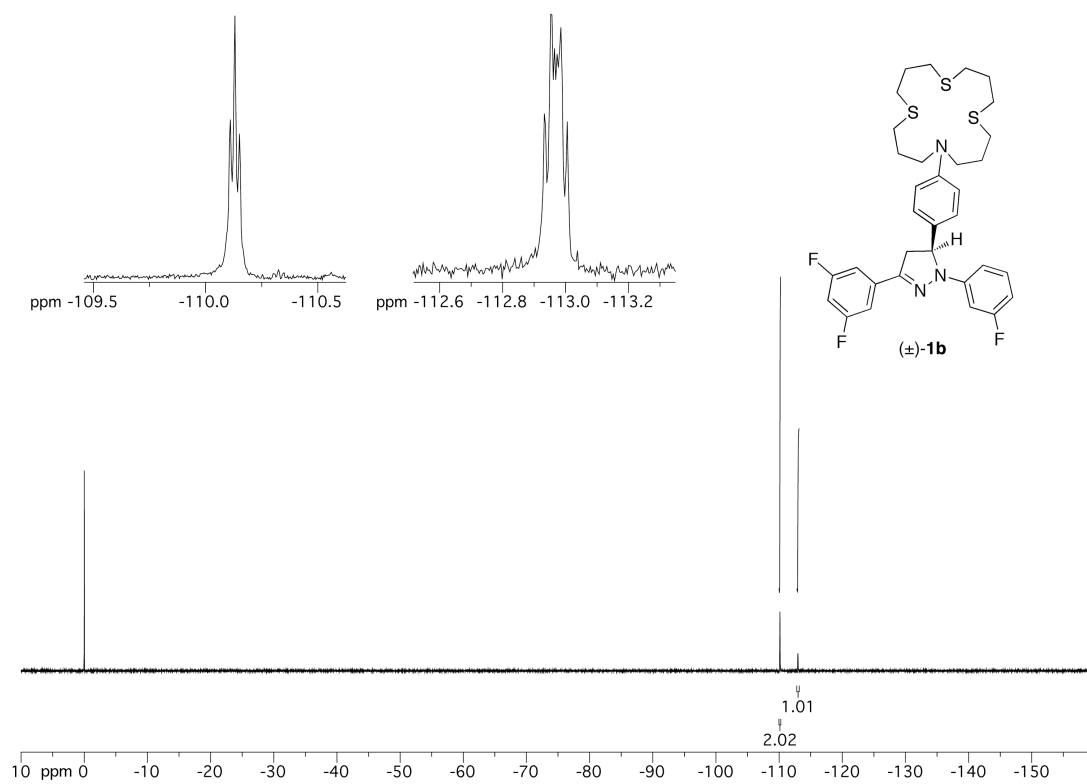

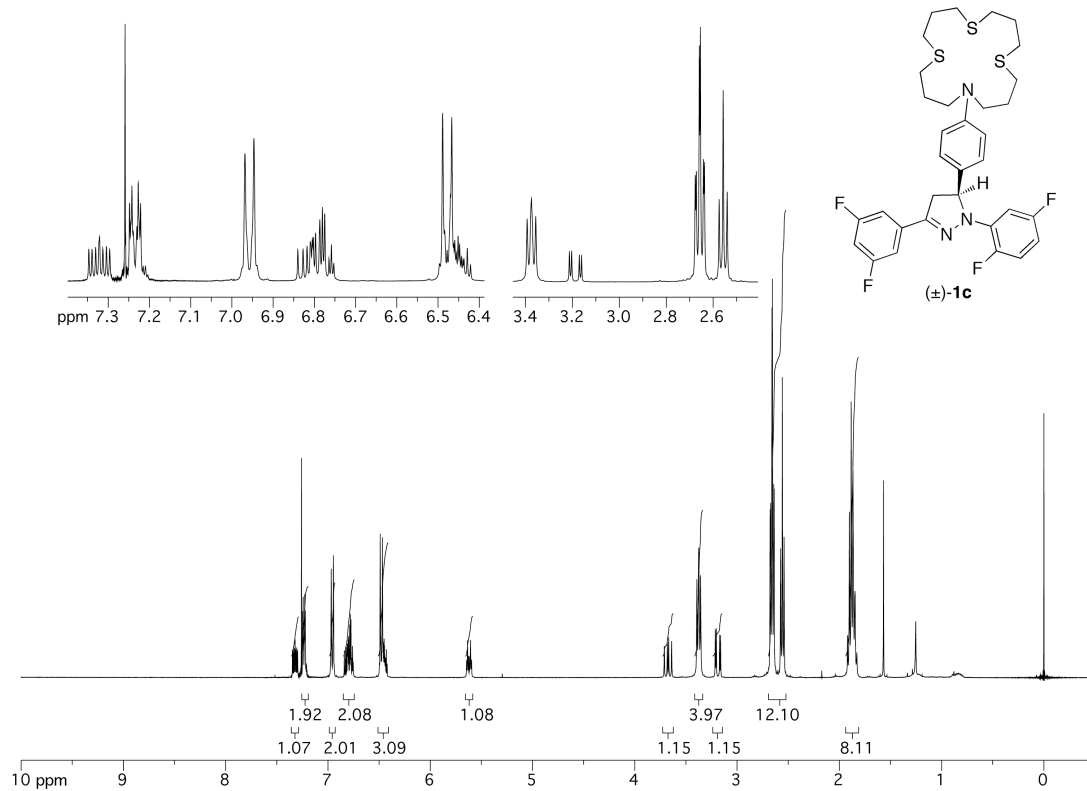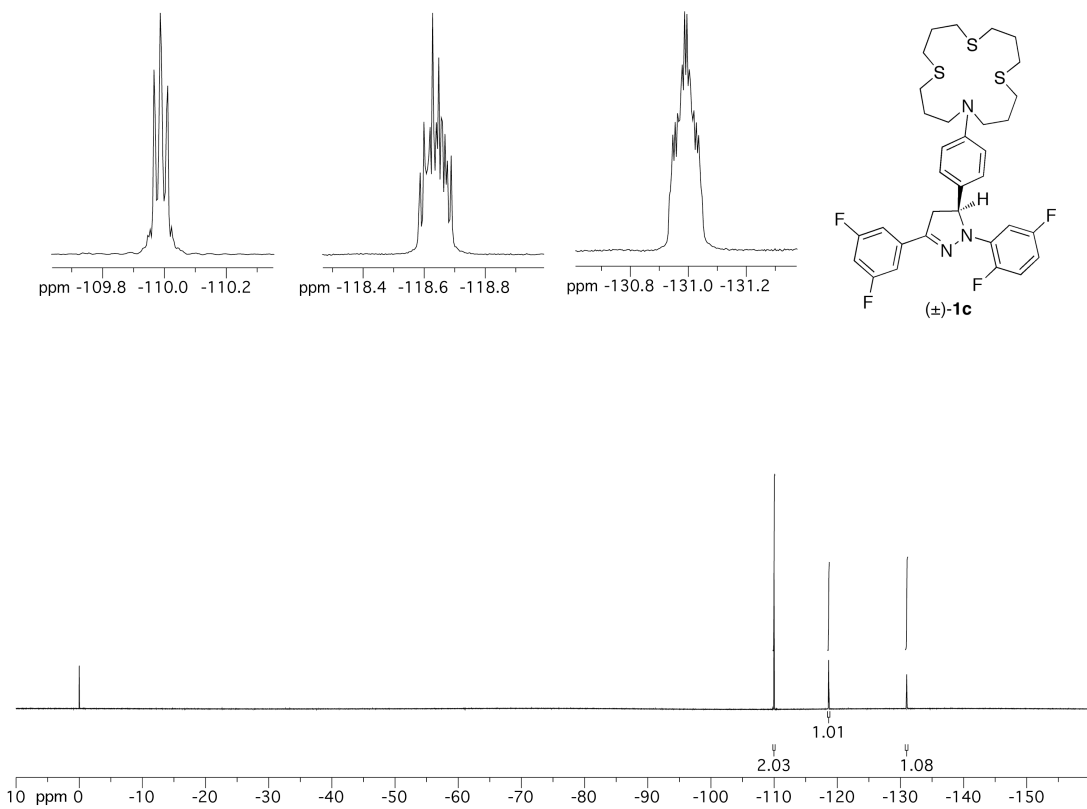

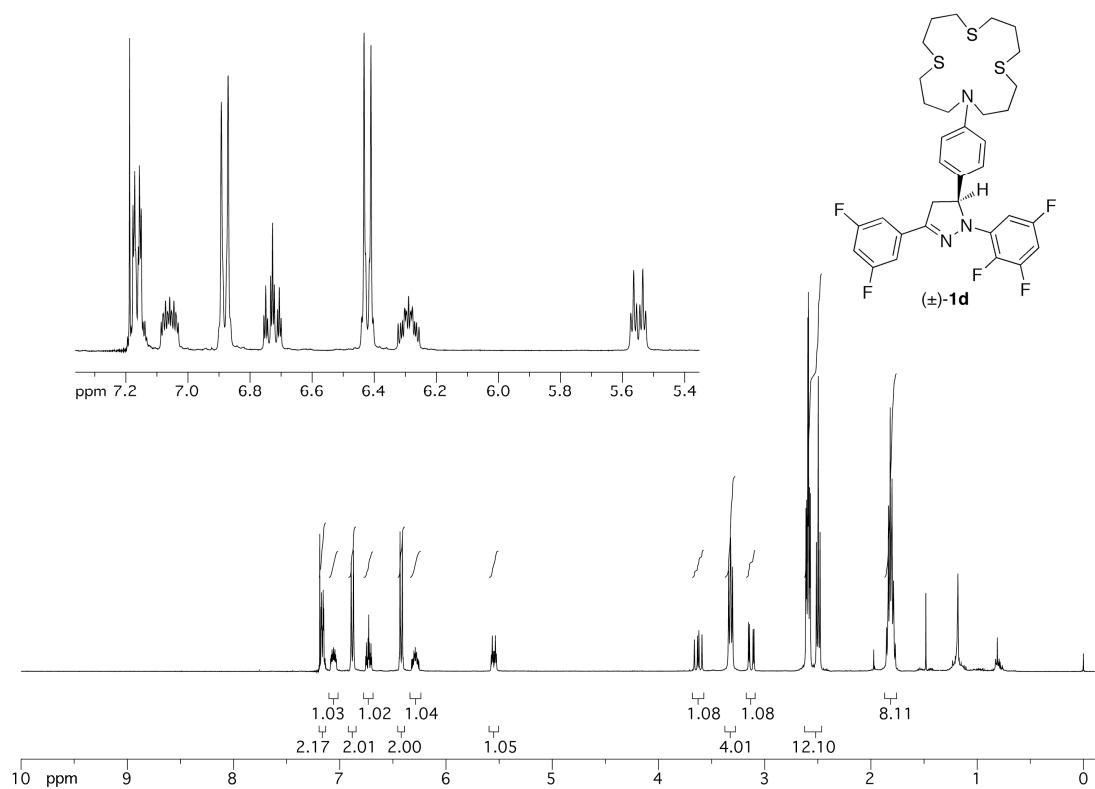

<sup>19</sup>F-NMR (CDCl<sub>3</sub>, 376 MHz)

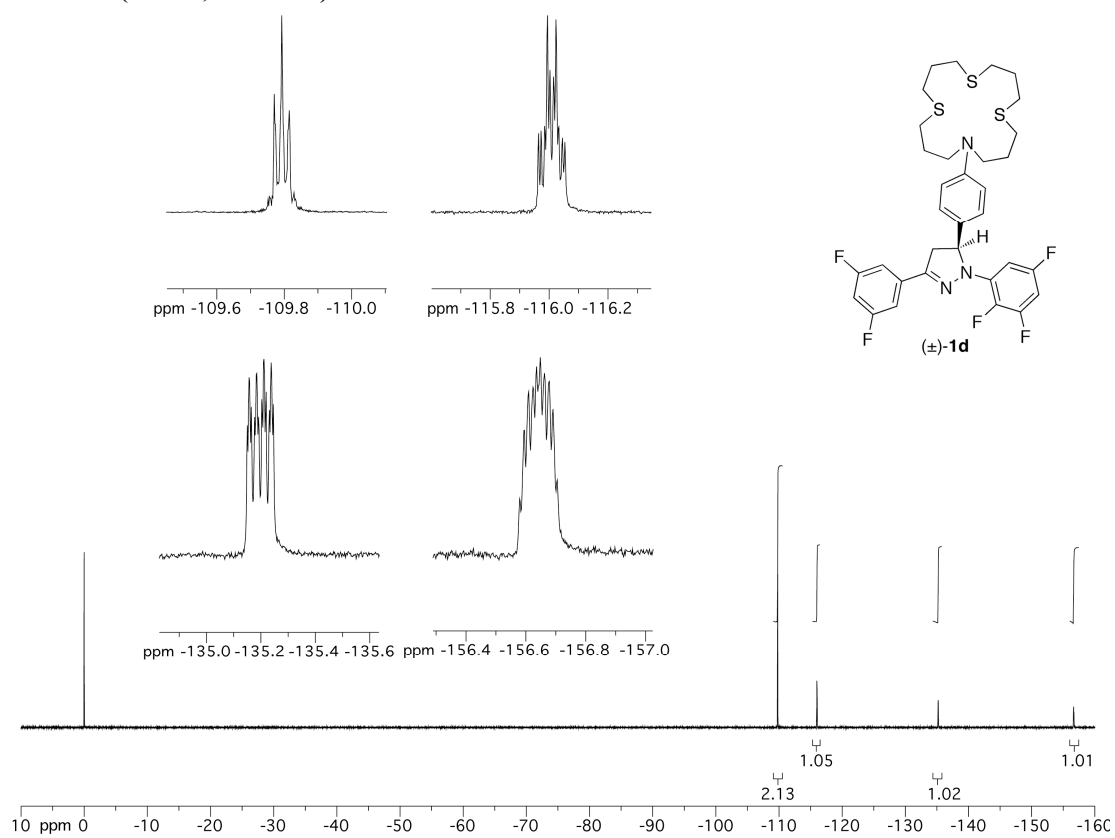

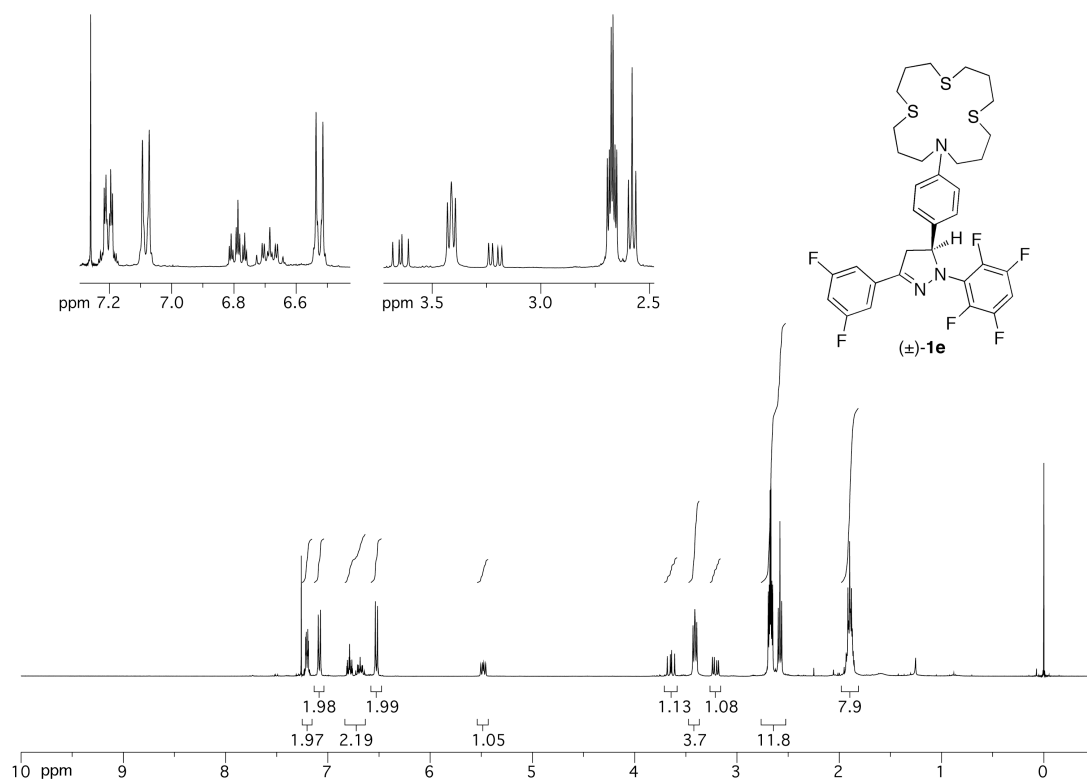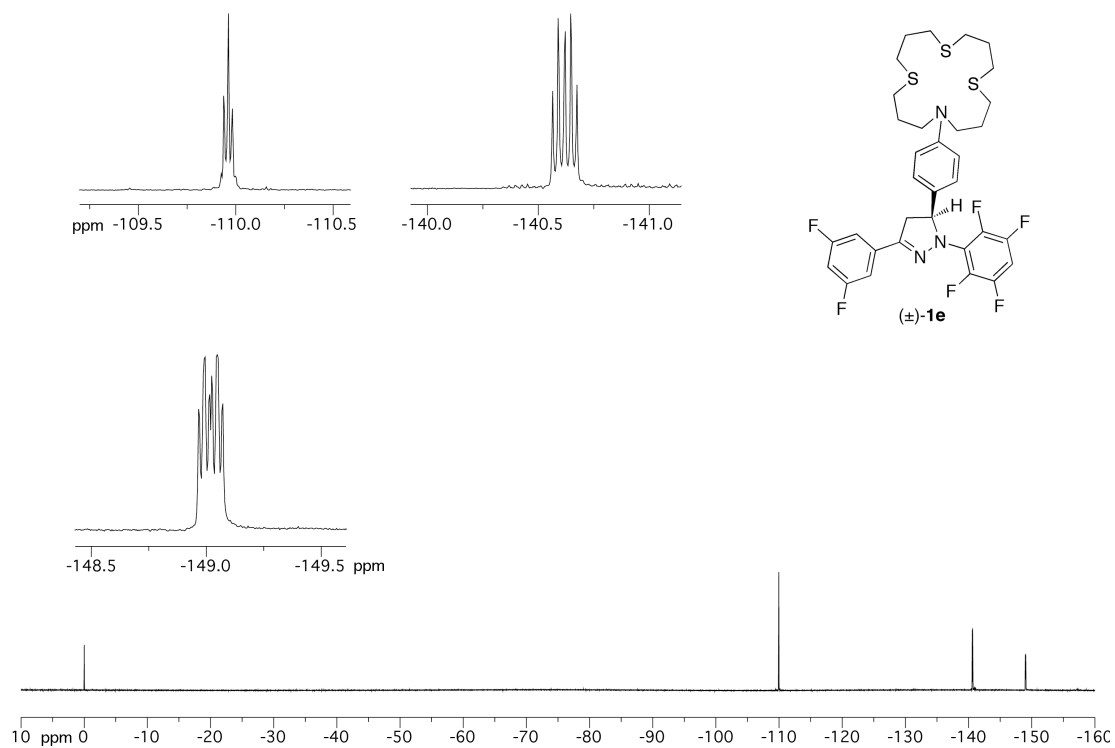



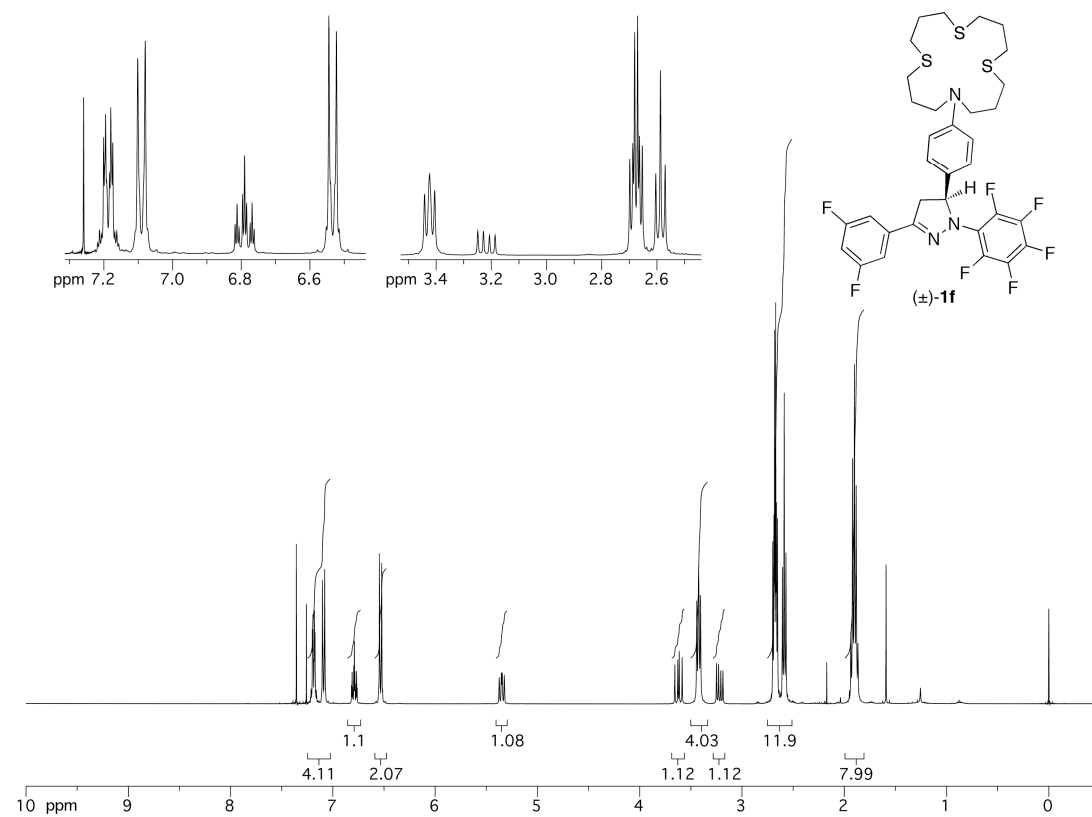

**<sup>19</sup>F-NMR (CDCl<sub>3</sub>, 376 MHz)**

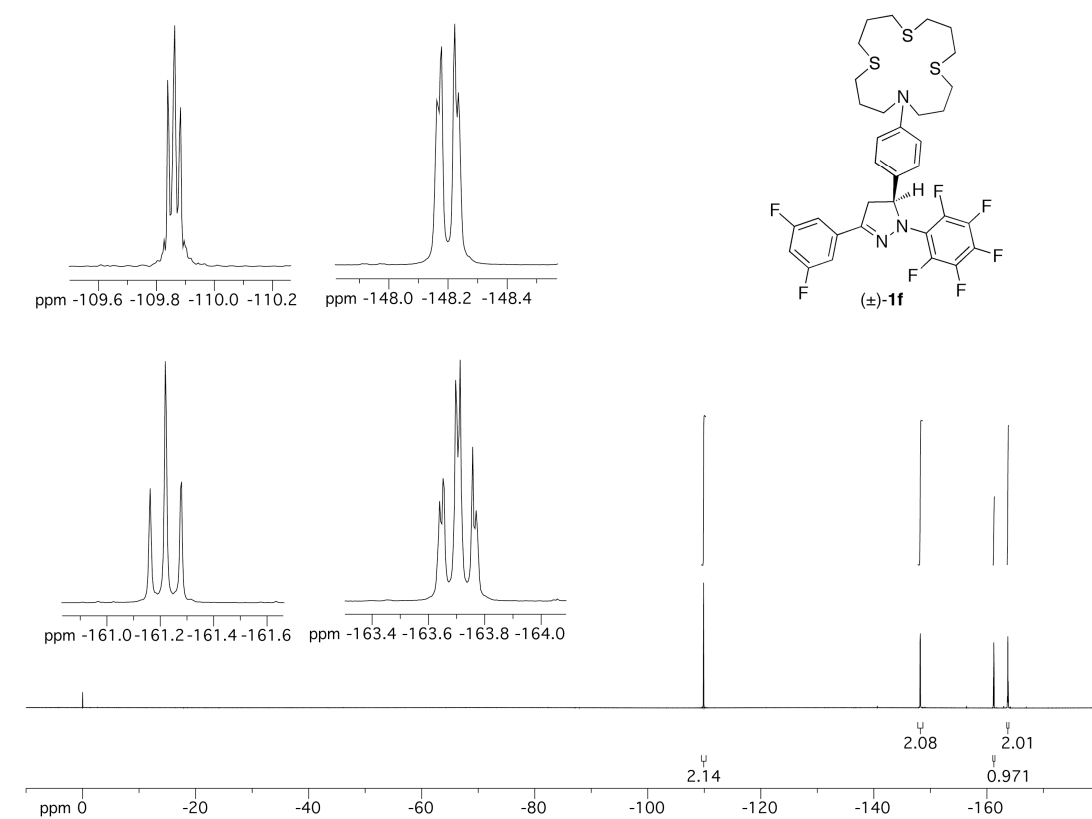

Supplement: b918311f.pdf [file b918311f.pdf]
